# Supplementary material
Source: publisher site journal article supplement (https://www.dovepress.com/get_supplementary_file.php?f=490832.xlsx)
Supplement: Supplementary file 1 [file get_supplementary_file.php]

## Sheet: Sheet1
Supplementary Table 1. Differentially expressed genes between 12 months Benralizumab treatment and 0 month (pre-treatment). Log2Fold Change: Expression level in 12 months Benralizumab treatment against 0 month. FDR: Benjamini and Hochberg's false discovery rate
		log2FoldChange	FDR
Up-regulated genes
	ACADS	2.46	0.0116
	VSIG8	4.52	0.0148
	ECHDC2	1.5	0.0195
	ACOT4	2.38	0.026
	HOOK1	2.95	0.0316
	KRT81	3.54	0.0381
	HN1L	1.28	0.0489
Down-regulated genes
	SLA	-2.77	0.0002
	SPI1	-3.49	0.0007
	ARHGDIB	-2.63	0.0008
	FLJ45340	-5.82	0.0008
	CXCR1	-4.88	0.001
	MARCKS	-2.99	0.001
	SMAP2	-2.99	0.001
	MALAT1	-2.14	0.001
	IFITM2	-3.64	0.001
	NCF1	-3.95	0.001
	SBNO2	-2.22	0.001
	SELL	-4.66	0.001
	ARHGAP25	-4.79	0.0013
	FGR	-3.63	0.0013
	WAS	-4.21	0.0013
	ITGB2	-2.94	0.0018
	FCGR2A	-4.34	0.0019
	TLR4	-3.59	0.0025
	CXCR2	-3.36	0.0027
	HCK	-4.44	0.0031
	FYB	-4.23	0.0032
	GCA	-5.01	0.0036
	FMNL1	-4.26	0.0036
	MSN	-2.94	0.0038
	FPR1	-3.87	0.0042
	TYROBP	-2.42	0.0042
	PDLIM7	-3.78	0.0045
	STX6	-2.23	0.0049
	GBP2	-3.63	0.005
	IFITM1	-4.01	0.0051
	IFITM3	-3.97	0.0055
	BCL2A1	-2.78	0.0061
	SAMSN1	-3.56	0.0077
	IL17RA	-5.4	0.0094
	B2M	-1.93	0.0095
	CD14	-2.88	0.0095
	FCER1G	-2.9	0.0095
	SHISA5	-2.57	0.0095
	SRGN	-3.13	0.0095
	LRRK2	-3.63	0.0109
	ITGAX	-3.16	0.011
	SH2B2	-3.45	0.0111
	IVNS1ABP	-3.68	0.0112
	G0S2	-2.56	0.0119
	ZNFX1	-1.75	0.0126
	ZDHHC18	-4.3	0.0139
	CTSS	-3.36	0.0141
	IL8	-3.06	0.0141
	MLLT1	-4.64	0.0144
	TREM1	-2.88	0.0144
	LOC100507217	-1.66	0.0144
	NAMPT	-2.61	0.0144
	BOK	-3.17	0.0147
	MCL1	-2.1	0.0148
	UPK3BL	-2.74	0.0148
	CEACAM3	-3.55	0.0156
	SOCS3	-1.89	0.016
	FLJ14186	-4.24	0.016
	GLA	-3.42	0.016
	AQP9	-2.2	0.0161
	ITGA5	-3.96	0.0173
	SECTM1	-3.52	0.0174
	CPPED1	-3.69	0.0178
	LCP2	-2.56	0.0183
	IFNGR1	-3.32	0.0195
	PLEK	-2.36	0.0195
	TNFRSF1B	-3.69	0.0195
	ARL5B	-1.65	0.0205
	SNORA68	-3.23	0.0217
	DUSP1	-2.14	0.022
	NCF4	-3.42	0.0228
	PLEKHO2	-2.97	0.023
	IRF1	-3.32	0.0236
	MBOAT7	-3.77	0.0236
	TMSB4X	-1.49	0.0236
	FOS	-2.06	0.0241
	EGR1	-3.63	0.0244
	EHBP1L1	-1.98	0.0244
	ZFP36L1	-2.85	0.0244
	DDX60L	-2.56	0.0252
	SCARNA10	-2.12	0.0252
	LILRA6	-3.82	0.0254
	MNDA	-3.91	0.0257
	VNN2	-3.3	0.0257
	TSC22D3	-3.74	0.027
	TNFRSF10C	-3.89	0.0273
	FCGR3A	-3.9	0.0279
	MMP25	-4	0.028
	CSRNP1	-1.66	0.0283
	FAM114A2	-4.14	0.0283
	FBXW4	-1.78	0.0283
	FFAR2	-2.94	0.0283
	SELPLG	-3.03	0.0283
	SH3BP5	-3.12	0.0283
	CSNK1D	-2.48	0.0289
	ADAM10	-1.97	0.0295
	BCL6	-1.51	0.0296
	SLC2A3	-3.3	0.0299
	LCP1	-1.87	0.0303
	SLED1	-2.96	0.0316
	ASAH1	-3.24	0.032
	ABCA1	-2.66	0.0331
	MVP	-3.14	0.0335
	PTGS2	-2.8	0.036
	HCAR2	-2.31	0.0367
	NBEAL2	-2.92	0.0367
	C7orf50	-3.86	0.0367
	DENND6A	-3.68	0.0367
	GMIP	-3.56	0.0374
	HOOK3	-4.04	0.0394
	STK4	-1.78	0.0415
	FPR2	-2.19	0.0416
	LAPTM5	-2.16	0.0416
	SCARNA13	-1.79	0.0416
	THEMIS2	-2.29	0.0433
	RBM22	-1.99	0.0433
	IFI30	-1.4	0.0437
	LILRB2	-4.01	0.0452
	LYN	-2.11	0.0462
	MYO1F	-3.58	0.0462
	PKN2	-3.58	0.0462
	SOD2	-1.84	0.0462
	U2AF1	-3.72	0.0462
	VNN3	-3.16	0.0466
	NINJ1	-2.1	0.0496
	RNF149	-2.98	0.0496
	KDM4B	-2.88	0.0497
